# Supplementary material for: The Use and Effects of Electronic Health Tools for Patient Self-Monitoring and Reporting of Outcomes Following Medication Use: Systematic Review
Source: PubMed Central journal article supplement (PMC6315271; doi:10.2196/jmir.9284), 2018-12-18
Supplement: jmir_v20i12e294_app1.pdf [file jmir_v20i12e294_app1.pdf]

## Multimedia Appendix I:

### Medline Search Strategy

April 25, 2018

|    |                                                                                                             |
|----|-------------------------------------------------------------------------------------------------------------|
| 1  | electronic health records/                                                                                  |
| 2  | Health information exchange/                                                                                |
| 3  | Health records, personal/                                                                                   |
| 4  | Web-based applications.mp.                                                                                  |
| 5  | ehealth.mp.                                                                                                 |
| 6  | Ehealth.mp.                                                                                                 |
| 7  | Online medical record*.mp.                                                                                  |
| 8  | Electronic medical record*.mp.                                                                              |
| 9  | Electronic health record*.mp.                                                                               |
| 10 | Interactive health communication applications.mp.                                                           |
| 11 | Personal health record*.mp.                                                                                 |
| 12 | Electronic personal health record.mp.                                                                       |
| 13 | Self-management support system*.mp.                                                                         |
| 14 | Telepharmacy.mp.                                                                                            |
| 15 | Electronic reporting system*.mp.                                                                            |
| 16 | personal health record.tw.                                                                                  |
| 17 | ehealth.tw.                                                                                                 |
| 18 | online medical record.tw.                                                                                   |
| 19 | electronic medical record.tw.                                                                               |
| 20 | electronic health record.tw.                                                                                |
| 21 | 1 or 2 or 3 or 4 or 5 or 6 or 7 or 8 or 9 or 10 or 11 or 12 or 13 or 14 or 15 or 16 or 17 or 18 or 19 or 20 |

|    |                                                       |
|----|-------------------------------------------------------|
|    |                                                       |
| 22 | "Drug-Related Adverse effects and Adverse Reactions"/ |
| 23 | Adverse drug reaction reporting/                      |
| 24 | Side effect*.mp.                                      |
| 25 | Patient reported outcomes.mp.                         |
| 26 | Self-management.mp.                                   |
| 27 | Patient monitoring.mp.                                |
| 28 | Patient self-assess*.mp.                              |
| 29 | 22 or 23 or 24 or 25 or 26 or 27 or 28                |
| 30 | 21 and 29                                             |
|    |                                                       |
| 31 | smartphone.mp.                                        |
| 32 | mobile phone.mp.                                      |
| 33 | (self-care or self-report).kw.                        |
| 34 | (mobile health or mhealth).kw.                        |
| 35 | (telehealth or telemedicine).kw.                      |
| 36 | (mobile application or mobile apps).kw.               |
| 37 | 31 or 32 or 33 or 34 or 35 or 36                      |
| 38 | 30 and 37                                             |
| 39 | limit 38 to (english language and yr="2000-Current")  |

### **EMBASE search strategy**

April 25, 2018

|   |                            |
|---|----------------------------|
| 1 | Electronic medical record/ |
| 2 | Web-based applications.mp. |

|    |                                                   |
|----|---------------------------------------------------|
| 3  | ehealth.mp.                                       |
| 4  | Online medical record*.mp.                        |
| 5  | Electronic medical record*.mp.                    |
| 6  | Electronic health record*.mp.                     |
| 7  | Interactive health communication applications.mp. |
| 8  | Personal health record*.mp.                       |
| 9  | Electronic personal health record.mp.             |
| 10 | Self-management support system*.mp.               |
| 11 | 1 or 2 or 3 or 4 or 5 or 6 or 7 or 8 or 9 or 10   |
|    |                                                   |
| 12 | Drug surveillance program/                        |
| 13 | Self-assessment.mp.                               |
| 14 | Drug related problem*.mp.                         |
| 15 | Self-monitor*.mp.                                 |
| 16 | Patient reported outcomes.mp.                     |
| 17 | Self-management.mp.                               |
| 18 | patient self-assess*.mp.                          |
| 19 | 12 or 13 or 14 or 15 or 16 or 17 or 18            |
| 20 | 11 and 19                                         |
|    |                                                   |
| 21 | smartphone.mp.                                    |
| 22 | mobile phone.mp.                                  |
| 23 | (self-care or self-report).kw.                    |
| 24 | (mobile health or mhealth).kw.                    |

|    |                                                      |
|----|------------------------------------------------------|
| 25 | (telehealth or telemedicine).kw.                     |
| 26 | (mobile application or mobile apps).kw.              |
| 27 | 21 or 22 or 23 or 24 or 25 or 26                     |
| 28 | 20 and 27                                            |
| 29 | limit 28 to (english language and yr="2000-Current") |

### **CINAHL search strategy**

April 25, 2018

|         |                                                                                                                 |
|---------|-----------------------------------------------------------------------------------------------------------------|
| S3<br>8 | S31 AND S38 Search modes - Boolean/Phrase<br><br>Limiters - Published Date: 20000101-20180425; English Language |
| S3<br>7 | S31 OR S32 OR S33 OR S34 OR S35 OR S36                                                                          |
| S3<br>6 | smartphone                                                                                                      |
| S3<br>5 | mobile phone                                                                                                    |
| S3<br>4 | self-care OR self-report                                                                                        |
| S3<br>3 | mobilehealth OR mealth                                                                                          |
| S3<br>2 | telehealth OR telemedicine                                                                                      |
| S3<br>1 | mobile applications OR mobile apps                                                                              |
| S3<br>0 | S16 AND S29                                                                                                     |
| S2<br>9 | S17 OR S18 OR S19 OR S20 OR S21 OR S22 OR S23 OR S24 OR S25 OR S26 OR S27 OR S28                                |
| S2<br>8 | "patient self-assess*"                                                                                          |

|         |                                                                                              |
|---------|----------------------------------------------------------------------------------------------|
| S2<br>7 | "self-management"                                                                            |
| S2<br>6 | "patient reported outcomes"                                                                  |
| S2<br>5 | "self-monitor*"                                                                              |
| S2<br>4 | "drug effect*"                                                                               |
| S2<br>3 | "drug reaction"                                                                              |
| S2<br>2 | "drug related problem*"                                                                      |
| S2<br>1 | "side effect*"                                                                               |
| S2<br>0 | MH "Adverse Drug Event"                                                                      |
| S1<br>9 | MH "self disclosure"                                                                         |
| S1<br>8 | MH "self assessment"                                                                         |
| S1<br>7 | MH "self care"                                                                               |
| S1<br>6 | S1 OR S2 OR S3 OR S4 OR S5 OR S6 OR S7 OR S8 OR S9 OR S10 OR S11 OR S12 OR S13 OR S14 OR S15 |
| S1<br>5 | "Electronic reporting system*"                                                               |
| S1<br>4 | "telepharmacy"                                                                               |
| S1<br>3 | "self-management support system*"                                                            |
| S1<br>2 | "electronic personal health record"                                                          |
| S11     | "personal health record*"                                                                    |
| S1<br>0 | "interactive health communication applications"                                              |
| S9      | "electronic health record*"                                                                  |

|    |                                  |
|----|----------------------------------|
| S8 | "Electronic medical record*"     |
| S7 | "Online medical record*"         |
| S6 | "Ehealth"                        |
| S5 | "ehealth"                        |
| S4 | ""Web-based applications""       |
| S3 | MH "Medical Records, Personal"   |
| S2 | MH "Electronic Data Interchange" |
| S1 | MH "Computerized Patient Record" |
