# Supplementary material for: The Use and Effects of Electronic Health Tools for Patient Self-Monitoring and Reporting of Outcomes Following Medication Use: Systematic Review
Source: PubMed Central journal article supplement (PMC6315271; doi:10.2196/jmir.9284), 2018-12-18
Supplement: jmir_v20i12e294_app3.pdf [file jmir_v20i12e294_app3.pdf]

### Multimedia Appendix III: Risk of Bias Assessment Questions

Taken from the Agency for Health Research and Quality’s 2014 Methods Guide for Effectiveness and Comparative Effectiveness Reviews [18]

#### Randomized Controlled Trials

| Risk of Bias            | Criterion                                                                                                                                                                                                               |
|-------------------------|-------------------------------------------------------------------------------------------------------------------------------------------------------------------------------------------------------------------------|
| <b>Selection Bias</b>   | Was the allocation sequence generated adequately (e.g., random number table, computer-generated randomization)?                                                                                                         |
|                         | Was the allocation of treatment adequately concealed (e.g., pharmacy- controlled randomization or use of sequentially numbered sealed envelopes)?                                                                       |
|                         | Were participants analyzed within the groups they were originally assigned to?                                                                                                                                          |
|                         | Does the design or analysis control account for important confounding and modifying variables through matching, stratification, multivariable analysis, or other approaches?                                            |
| <b>Performance Bias</b> | Did researchers rule out any impact from a concurrent intervention or an unintended exposure that might bias results?                                                                                                   |
|                         | Did the study maintain fidelity to the intervention protocol?                                                                                                                                                           |
| <b>Attrition Bias</b>   | If attrition (overall or differential nonresponse, dropout, loss to follow-up, or exclusion of participants) was a concern, were missing data handled appropriately (e.g., intention-to-treat analysis and imputation)? |
| <b>Detection Bias</b>   | In prospective studies, was the length of follow-up different between the groups, or in case-control studies, was the time period between the intervention/exposure and outcome the same for cases and controls?        |
|                         | Were the outcome assessors blinded to the intervention or exposure status of participants                                                                                                                               |
|                         | Were interventions/exposures assessed/defined using valid and reliable measures, implemented consistently across all study participants?                                                                                |
|                         | Were outcomes assessed/defined using valid and reliable measures, implemented consistently across all study participants?                                                                                               |
| <b>Reporting Bias</b>   | Were the potential outcomes pre-specified by the researchers? Are all pre-specified outcomes reported?                                                                                                                  |

#### Cohort and Non-Randomized Controlled Trials

| Risk of Bias            | Criterion                                                                                                                                                                    |
|-------------------------|------------------------------------------------------------------------------------------------------------------------------------------------------------------------------|
| <b>Selection Bias</b>   | Were participants analyzed within the groups they were originally assigned to?                                                                                               |
|                         | Did the study apply inclusion/exclusion criteria uniformly to all comparison groups?                                                                                         |
|                         | Did the strategy for recruiting participants into the study differ across study groups?                                                                                      |
|                         | Does the design or analysis control account for important confounding and modifying variables through matching, stratification, multivariable analysis, or other approaches? |
| <b>Performance Bias</b> | Did researchers rule out any impact from a concurrent intervention or an unintended exposure that might bias results?                                                        |

|                       |                                                                                                                                                                                                                                                                       |
|-----------------------|-----------------------------------------------------------------------------------------------------------------------------------------------------------------------------------------------------------------------------------------------------------------------|
|                       | Did the study maintain fidelity to the intervention protocol?                                                                                                                                                                                                         |
| <b>Attrition Bias</b> | If attrition (overall or differential nonresponse, dropout, loss to follow-up, or exclusion of participants) was a concern, were missing data handled appropriately (e.g., intention-to-treat analysis and imputation)?                                               |
| <b>Detection Bias</b> | In prospective studies, was the length of follow-up different between the groups, or in case-control studies, was the time period between the intervention/exposure and outcome the same for cases and controls?                                                      |
|                       | Were the outcome assessors blinded to the intervention or exposure status of participants?                                                                                                                                                                            |
|                       | Were interventions/exposures assessed/defined using valid and reliable measures, implemented consistently across all study participants?<br>Were outcomes assessed/defined using valid and reliable measures, implemented consistently across all study participants? |
|                       | Were confounding variables assessed using valid and reliable measures, implemented consistently across all study participants?                                                                                                                                        |
| <b>Reporting Bias</b> | Were the potential outcomes pre-specified by the researchers? Are all pre-specified outcomes reported?                                                                                                                                                                |
