# Supplementary material for: The Use and Effects of Electronic Health Tools for Patient Self-Monitoring and Reporting of Outcomes Following Medication Use: Systematic Review
Source: PubMed Central journal article supplement (PMC6315271; doi:10.2196/jmir.9284), 2018-12-18
Supplement: jmir_v20i12e294_app4.pdf [file jmir_v20i12e294_app4.pdf]

## Multimedia Appendix IV: Supplemental Tables for Subgroups and Details about Outcomes.

### Supplemental Table 1: Design and outcomes of included studies

| 1 <sup>st</sup> Author (year)   | Intervention                                                                                                                                                                                                                                           | Comparator Group(s)                                                                                                                                                                               | Study Duration | Outcomes Measured                                                                                                                                                                                                                                                                                                                                                                                                                                                                                                                                                                                                                                                                                                             | Notable ehealth Tool Features:                            |
|---------------------------------|--------------------------------------------------------------------------------------------------------------------------------------------------------------------------------------------------------------------------------------------------------|---------------------------------------------------------------------------------------------------------------------------------------------------------------------------------------------------|----------------|-------------------------------------------------------------------------------------------------------------------------------------------------------------------------------------------------------------------------------------------------------------------------------------------------------------------------------------------------------------------------------------------------------------------------------------------------------------------------------------------------------------------------------------------------------------------------------------------------------------------------------------------------------------------------------------------------------------------------------|-----------------------------------------------------------|
| <b>Cho (2006) [19]</b>          | <p>IBGMS</p> <p>Participants attended an initial diabetes educational session</p> <p>Outpatient clinical visit for diabetes every three months</p> <p>Use of IBGMS website to upload blood glucose, medication use, blood pressure and weight data</p> | <p>Control group participated in the initial diabetes educational session and attended clinical visits every three months</p> <p>Used informal paper-based system to record clinical outcomes</p> | 30 months      | <ul style="list-style-type: none"> <li>• Recommendations provided for drug modification</li> <li>• Total number of drug modifications</li> </ul>                                                                                                                                                                                                                                                                                                                                                                                                                                                                                                                                                                              | Participants able to ask health questions via the website |
| <b>Chrischilles (2014) [20]</b> | <p>Iowa PHR</p> <p>Designed for older adults, focusing on simplicity, readability, and quick navigation</p> <p>Patients manually enter information (such as medications)</p>                                                                           | Usual care                                                                                                                                                                                        | 6 months       | <ul style="list-style-type: none"> <li>• Mean number of prescription medications</li> <li>• Mean number of OTC medications</li> <li>• Change in medication use in past three months</li> <li>• Use of potentially inappropriate medications (ACOVE)</li> <li>• Taking two or more NSAIDS or ASA</li> <li>• Number of medication management problems</li> <li>• Knows how to recognize adverse effects</li> <li>• Adverse effects in past three months</li> <li>• Modified Morisky adherence score</li> <li>• Keep list of current medications</li> <li>• Reason for medications on list</li> <li>• Usually shows drug list to doctor</li> <li>• Put OTC drugs on list</li> <li>• Updated list in past three months</li> </ul> | Health event tracking, drug alerts                        |

|                              |                                                                                                                                                                                                               |                                                                                                                                                                  |                  |                                                                                                                                                                                                                                                                                                                                                                                                                                                                                            |                                                                                      |
|------------------------------|---------------------------------------------------------------------------------------------------------------------------------------------------------------------------------------------------------------|------------------------------------------------------------------------------------------------------------------------------------------------------------------|------------------|--------------------------------------------------------------------------------------------------------------------------------------------------------------------------------------------------------------------------------------------------------------------------------------------------------------------------------------------------------------------------------------------------------------------------------------------------------------------------------------------|--------------------------------------------------------------------------------------|
| <b>Fiks (2015) [21]</b>      | <p>MyAsthma</p> <p>Tracks families' asthma treatment concerns and goals, children's asthma symptoms, medication adverse effects, and adherence</p>                                                            | <p>Access to a clinician-focused decision support system</p>                                                                                                     | <p>6 months</p>  | <ul style="list-style-type: none"> <li>• Medication receipt</li> <li>• Asthma-related healthcare use</li> <li>• Number of adverse effects reported</li> <li>• Number of poor/uncontrolled asthma</li> <li>• Nighttime symptoms</li> <li>• Daytime symptoms</li> <li>• Functional limitations</li> <li>• Parent activation</li> <li>• Satisfaction with asthma care</li> <li>• Days of school missed in past month (child)</li> <li>• Days of work missed in past month (parent)</li> </ul> | <p>Symptom and adverse effect tracking, goal planning, clinical decision support</p> |
| <b>Grant (2008) [22]</b>     | <p>Patient Gateway</p> <p>Online PHR with access to lab results and medication lists</p> <p>Patients reviewed drug lists, reported discrepancies, ask/answer questions</p> <p>Generate diabetes care plan</p> | <p>Control patients were asked to review medical histories, cancer screening history, and other non-diabetes related tasks similar to the intervention group</p> | <p>12 months</p> | <ul style="list-style-type: none"> <li>• Diabetes related medication changes</li> <li>• Medications initiated or changed for specific conditions</li> <li>• HbA1C</li> <li>• % of patients achieving goal HbA1C</li> </ul>                                                                                                                                                                                                                                                                 | <p>Ability to refill medications online</p>                                          |
| <b>Gustafson (2012) [23]</b> | <p>Comprehensive Health Enhancement Support System plus monthly nurse case management</p> <p>(CHESS+CM) System for parents and children</p>                                                                   | <p>Usual care plus asthma information</p>                                                                                                                        | <p>12 months</p> | <ul style="list-style-type: none"> <li>• Medication adherence</li> <li>• Competence</li> <li>• Self-efficacy</li> <li>• Social support</li> <li>• HRQoL</li> <li>• Symptom free days</li> </ul>                                                                                                                                                                                                                                                                                            | <p>Information presented as games</p>                                                |
| <b>Joseph (2007) [24]</b>    | <p>Puff City</p> <p>Web-based program focused on controller medication adherence, rescue inhaler availability, and smoking cessation/reductio</p>                                                             | <p>Four thirty-minute sessions of generic asthma education websites</p>                                                                                          | <p>12 months</p> | <ul style="list-style-type: none"> <li>• Asthma-related ED visits</li> <li>• Asthma-related hospitalizations</li> <li>• Controller medication adherence</li> <li>• QoL</li> <li>• Symptom-nights</li> <li>• Symptom-days</li> <li>• Days of restricted activity</li> </ul>                                                                                                                                                                                                                 | <p>Module to visually identify drugs and dosage</p>                                  |

|                              |                                                                                                                                                                                                                         |                                                                                                                                                                                                       |           |                                                                                                                                                                                                                                                                                                                                                                                                                                            |                                                      |
|------------------------------|-------------------------------------------------------------------------------------------------------------------------------------------------------------------------------------------------------------------------|-------------------------------------------------------------------------------------------------------------------------------------------------------------------------------------------------------|-----------|--------------------------------------------------------------------------------------------------------------------------------------------------------------------------------------------------------------------------------------------------------------------------------------------------------------------------------------------------------------------------------------------------------------------------------------------|------------------------------------------------------|
|                              | n                                                                                                                                                                                                                       |                                                                                                                                                                                                       |           | <ul style="list-style-type: none"> <li>• Days of changed plans</li> <li>• Schooldays missed</li> <li>• Changes in rescue inhaler availability</li> </ul>                                                                                                                                                                                                                                                                                   |                                                      |
| <b>Joseph (2013) [25]</b>    | <p>Puff City</p> <p>Web-based program focused on controller medication adherence, rescue inhaler availability, and smoking cessation/reduction</p>                                                                      | Four thirty-minute sessions of generic asthma education websites                                                                                                                                      | 12 months | <ul style="list-style-type: none"> <li>• ED visits and hospitalizations</li> <li>• Symptom-days</li> <li>• Symptom-nights</li> <li>• Schooldays missed</li> <li>• Days of restricted activity</li> </ul>                                                                                                                                                                                                                                   | Module to visually identify drugs and dosage         |
| <b>Schnipper (2012) [26]</b> | <p>Patient Gateway</p> <p>Online PHR with access to medication lists</p> <p>Intervention group filled out medication e-journals</p> <p>Contacted by study team to report medication discrepancies, ADE and symptoms</p> | <p>Active Controls filled out e-journals relating to medical history and health maintenance. Matched controls also contacted by study team to report medication discrepancies, symptoms, and ADEs</p> | 18 months | <ul style="list-style-type: none"> <li>• % discordant medications</li> <li>• Discrepancies with medication list</li> <li>• Discrepancies with potential for harm</li> <li>• Discrepancies with potential for severe harm</li> <li>• Preventable/ameliorable ADEs</li> <li>• Duration of ameliorable ADEs</li> <li>• Reporting of all prescribed medications</li> <li>• Reporting of medication-related problems or new symptoms</li> </ul> | Online prescription refills, appointments, referrals |
| <b>Simon (2011) [27]</b>     | <p>EpicCare</p> <p>Patient website linked to this medical record able to refill prescriptions, view laboratory results and exchanging online messages with providers</p>                                                | Usual care                                                                                                                                                                                            | 5 months  | <ul style="list-style-type: none"> <li>• Number receiving additional antidepressant</li> <li>• Number (%) making any specialty mental health visits</li> <li>• Number using antidepressant for over 90 days</li> <li>• Mean mental health visits for medication management</li> <li>• Quality of antidepressant treatment</li> <li>• Severity of depression</li> <li>• Outcome and mean SCL at follow-up</li> </ul>                        | Ability to refill medications online                 |
| <b>Weingart</b>              | PatientSite                                                                                                                                                                                                             | Message with                                                                                                                                                                                          | 3 months  | <ul style="list-style-type: none"> <li>• Number of ADEs</li> </ul>                                                                                                                                                                                                                                                                                                                                                                         | Online                                               |

|                            |                                                                                                                                                                                                                                                                                  |                                                                                                                                 |                                                                                              |                                                                                                                                                                                                                          |                                                                |
|----------------------------|----------------------------------------------------------------------------------------------------------------------------------------------------------------------------------------------------------------------------------------------------------------------------------|---------------------------------------------------------------------------------------------------------------------------------|----------------------------------------------------------------------------------------------|--------------------------------------------------------------------------------------------------------------------------------------------------------------------------------------------------------------------------|----------------------------------------------------------------|
| <b>(2013) [28]</b>         | Web-based patient portal accessible to patients, allowing electronic messaging between patients and providers                                                                                                                                                                    | a link to the National Patient Safety Foundation Web site with information about resources for patients and families            |                                                                                              | <ul style="list-style-type: none"> <li>• Preventable ADEs</li> <li>• Ameliorable ADEs</li> <li>• Healthcare use</li> </ul>                                                                                               | prescription refills, appointments, referrals                  |
| <b>Mooney (2017) [29]</b>  | Symptom Care at Home (SCH) Interactive voice response system with four components: monitoring of 11 symptoms through self-reporting, self-management coaching, automated alerts for poorly controlled symptoms, and an electronic symptoms-based guideline for NPs to follow-up. | Enhanced Usual Care (UC) Includes the symptom reporting component of SCH but lacks self-management coaching and NP intervention | From study entry to through chemotherapy course completion or 6 months, whichever came first | <ul style="list-style-type: none"> <li>• Symptom severity across symptoms and the number of severe across symptoms and the number of severe, moderate, mild, and no symptom days</li> </ul>                              | Graphing of symptom history in EHR                             |
| <b>Ahmed (2018) [30]</b>   | My Asthma Portal (MAP) View their personal health information, access educational information, monitor and receive feedback regarding self-management strategies                                                                                                                 | Usual Care No access to MAP – continued to receive ongoing asthma care from their pulmonologist                                 | 6 months                                                                                     | <ul style="list-style-type: none"> <li>• Asthma control at six months</li> <li>• Asthma Quality of life</li> </ul>                                                                                                       | Ability to communicate with nurse case manager through the MAP |
| <b>Karhula (2015) [31]</b> | Remote Patient Monitoring (RPM) System: PHR App Enter steps, weight, blood pressure and blood glucose, sent to clinician, has reminders and messaging                                                                                                                            | Standard Care Disease management information booklet at time of diagnosis. Standard lab coaching and appointments               | 12 months                                                                                    | <ul style="list-style-type: none"> <li>• Primary outcomes are HRQL and HbA1c</li> <li>• Secondary outcomes include BP, weight, waist circumference, triglycerides, total cholesterol, LDL, HDL and adherence.</li> </ul> | Patient sends info to PHR weekly which links to EHR            |
| <b>Carlsen (2017) [32]</b> | eHealth tool Completed TIBS to determine                                                                                                                                                                                                                                         | Control group No use of the eHealth tool                                                                                        | Varied, max follow up is 2 years                                                             | <ul style="list-style-type: none"> <li>• Primary outcomes surround treatment: interval of drug therapy</li> </ul>                                                                                                        | eHealth tools calculates total inflammation                    |

|  |                                                         |  |  |                                                                                        |                                                                                                                 |
|--|---------------------------------------------------------|--|--|----------------------------------------------------------------------------------------|-----------------------------------------------------------------------------------------------------------------|
|  | frequency of infusions. Patients entered symptom scores |  |  | and treatment dose<br>• Secondary outcomes<br>measure IFX antibodies and concentration | burden score weekly to determine timing of next visit based on symptoms entered and fecal calprotectin analysis |
|--|---------------------------------------------------------|--|--|----------------------------------------------------------------------------------------|-----------------------------------------------------------------------------------------------------------------|

**Supplemental Table 2: Results per outcome from included studies-- Primary Outcome: Changes in Use of Medications and Other Therapies**

| Study                   | Outcome measure                                                                         | Effect measures                 | Result                                                                                                                                                                    |
|-------------------------|-----------------------------------------------------------------------------------------|---------------------------------|---------------------------------------------------------------------------------------------------------------------------------------------------------------------------|
| Cho, 2006 [19]          | Total occasions of drug modification (Reports through IBGMS)                            | n<br>Mean times/person (SD)     | Intervention:<br>150<br>4.7 (2.9)<br><br>Control:<br>187<br>5.5 (4.7)<br><br>$t = 0.92, P = .36$                                                                          |
| Chrischilles, 2014 [20] | Number of prescription medications (Patient self-report of medications used)            | Mean (SD)                       | Intervention: 4.0 (3.1)<br>Control: 4.1 (3.2)<br>$P = .68$                                                                                                                |
|                         | Number of OTC medications (Patient self-report of medications used)                     | Mean (SD)                       | Intervention: 3.6 (2.5)<br>Control: 3.9 (2.7)<br>$P = .053$                                                                                                               |
|                         | Any change in medication use in past 3 months (Patient self-report of medications used) | n (%)                           | Intervention: 349 (43.5)<br>Control: 124 (45.4)<br>$P = .58$                                                                                                              |
|                         | Use of potentially inappropriate medications (Patient self-report of medications used)  | n (%)                           | Intervention: 164 (20.4)<br>Control: 53 (19)<br>$P = .71$                                                                                                                 |
|                         | Taking 2 or more NSAIDS (including aspirin) (Patient self-report of medications used)   | n (%)                           | Intervention: 113 (14.1)<br>Control: 53 (19)<br>$P = .036$                                                                                                                |
| Fiks, 2015 [21]         | Medication receipt (EHR listed asthma medications)                                      | Mean number medications / child | Intervention:<br>Inhaled steroids: 1.1<br>Oral steroids: 0.4<br><br>Control:<br>Inhaled steroids: 0.7<br>Oral steroids: 1.0<br><br>No between-groups comparisons reported |
| Grant, 2008 [22]        | Diabetes-related medication changes (Patient self-report via PHR)                       | n (%)                           | Intervention: 43.5 (53)<br>Control: 6.2 (15)<br>$P < .001$                                                                                                                |
|                         | Hypertension-related medication changes                                                 | n (%)                           | Intervention: 11 (13)<br>Control: 0 (0)<br>$P = .02$                                                                                                                      |
|                         | Hyperlipidemia-related medication changes                                               | n (%)                           | Intervention: 9 (11)<br>Control: 0 (0)<br>$P = .03$                                                                                                                       |
| Joseph, 2007 [24]       | Rescue inhaler availability (patient self-report)                                       | n (%)                           | Intervention: 59 (39)<br>Control: 46 (32)<br>$P = .01$                                                                                                                    |
| Simon, 2011 [27]        | Participants receiving additional antidepressant                                        | n (%)                           | Intervention: 23 (22)<br>Control: 16 (16)                                                                                                                                 |

|                    |                                                                                |                        |                                                              |
|--------------------|--------------------------------------------------------------------------------|------------------------|--------------------------------------------------------------|
|                    |                                                                                |                        | <i>P</i> = .27                                               |
|                    | Participants using antidepressant for over 90 days                             | n (%)                  | Intervention: 86 (81)<br>Control: 62 (61)<br><i>P</i> = .001 |
| Carlsen, 2017 [32] | Difference in average IFX dose per treatment between ehealth group and control | Dose in mg/kg (95% CI) | 0.54 (-0.36 to 1.43)<br><i>P</i> = 0.24                      |
|                    | Difference in treatment interval between ehealth group and control             | Weeks (95% CI)         | 2.35 (1.5 to 3.2)<br><i>P</i> < 0.001                        |

**Supplemental Table 3: Results per outcome from included studies-- Secondary Outcome: Patient Self-Management and Efficacy**

| Study                   | Outcome measure                                                                                    | Effect measures                                                                                                                                                                                                    | Result                                                                                             |
|-------------------------|----------------------------------------------------------------------------------------------------|--------------------------------------------------------------------------------------------------------------------------------------------------------------------------------------------------------------------|----------------------------------------------------------------------------------------------------|
| Chrischilles, 2014 [20] | Ability to recognize adverse effects (patient self-report)                                         | n (%)                                                                                                                                                                                                              | Intervention: 566 (73.7)<br>Control: 201 (75.3)<br><i>P</i> = .61                                  |
|                         | Usually shows medication list to doctor (patient self-report)                                      | n (%)                                                                                                                                                                                                              | Intervention: 435 (78.2)<br>Control: 154 (78.6)<br><i>P</i> = .92                                  |
| Fiks, 2015 [21]         | Parent Activation Measure questionnaire                                                            | Mean (SD)<br><br>Between- groups change score                                                                                                                                                                      | Intervention: 78.1 (72.6)<br>Control: 83.1 (15.9)<br>0.1<br><i>P</i> = .922                        |
| Gustafson, 2012 [23]    | Self-efficacy (patient self-report)                                                                | alpha ( <i>P</i> ) (intervention effect on the mediator)<br>beta ( <i>P</i> )(mediator's effect on dependent variable).<br>tau ( <i>P</i> ) (Intervention effect on the dependant variable after mediational test) | alpha = .080, <i>P</i> = .14<br><br>beta = .476, <i>P</i> = .01<br><br>tau = -.182, <i>P</i> = .07 |
|                         | Information competence (patient self-report)                                                       | alpha ( <i>P</i> )<br>beta ( <i>P</i> )<br>tau (p)                                                                                                                                                                 | alpha = .079, <i>P</i> = .09<br>beta = .476, <i>P</i> = .64<br>tau = -.235, <i>P</i> = .02         |
| Schnipper, 2012 [26]    | Report medication-related problems or new symptoms to doctor (patient self-report)                 | n (%) who responded "yes"                                                                                                                                                                                          | Intervention: 236 (97.9)<br>Control: 149 (87.1)<br><i>P</i> < .001                                 |
| Ahmed, [30]             | Results for differences in minimum asthma quality of life questionnaire adjusted for self-efficacy | Mean change (95% CI)                                                                                                                                                                                               | 0.24 (0.16 to 0.32)                                                                                |

**Supplemental Table 4: Results per outcome from included studies-- Secondary Outcome: Medication Use Behaviour (Adherence)**

| Study                   | Outcome measure                                                                          | Effect measures                                                               | Result                                                              |
|-------------------------|------------------------------------------------------------------------------------------|-------------------------------------------------------------------------------|---------------------------------------------------------------------|
| Chrischilles, 2014 [20] | Modified Morisky adherence score (patient self-report)                                   | Mean (SD)                                                                     | Intervention: 13.8 (1.9)<br>Control: 13.9 (1.9)<br><i>P</i> = .9821 |
| Gustafson, 2012 [23]    | Composite adherence score (sum of self-reported adherence data and pharmacy refill data) | Mean change in intervention group minus mean change in control group (95% CI) | 1.48% (-8.15% to 11.11%)<br><i>P</i> = .76                          |
|                         | Pharmacy refill possession ratio                                                         | Mean change in intervention group minus mean change in control group (95% CI) | -3.95% (-11.26% to 16.87%)<br><i>P</i> = .69                        |
|                         | Self-report of inhaled corticosteroid use                                                | Mean change in intervention group minus mean change in control group (95% CI) | 11.64% (-8.65% to 13.93%)<br><i>P</i> = .65                         |
|                         | Self-report of anticholinergic use                                                       | Mean change in intervention group minus mean change in control group (95% CI) | 2.81% (-11.26% to 16.87%)<br><i>P</i> = .69                         |
| Joseph, 2007 [24]       | Controller medication adherence (patient self-report)                                    | n (%)                                                                         | Intervention: 20.4 (31)<br>Control: 12.6 (18)                       |



|                       |                                                                    |                                      |                 |
|-----------------------|--------------------------------------------------------------------|--------------------------------------|-----------------|
|                       |                                                                    |                                      | <i>P</i> = .09  |
| Karhula, 2015<br>[31] | Average number of calls per patient                                | N (SD)                               | 8.7 (1.6)       |
|                       | Number of self-reported measurements                               |                                      | 8.5 (1.9)       |
|                       | Weight reports                                                     |                                      | <i>P</i> =0.40  |
|                       | Step counts                                                        |                                      |                 |
|                       | BP reports                                                         |                                      |                 |
|                       | Blood glucose reports                                              |                                      |                 |
|                       | Health-related quality of life assessments                         |                                      |                 |
|                       | Heart disease group                                                |                                      |                 |
|                       | Diabetes group                                                     |                                      |                 |
|                       | Time consumed by the nurse after the coaching in minutes           | N (SD)                               | 3.8 (3.0)       |
|                       | Heart disease group                                                |                                      | 4.5(3.6)        |
|                       | Diabetes group                                                     |                                      | <i>P</i> <0.001 |
|                       | Mean duration of coaching in minutes                               | Mean duration of coaching in minutes | N(SD)           |
|                       | Heart disease group                                                |                                      | 19.2 (8.1)      |
|                       | Diabetes group                                                     |                                      | <i>P</i> =0.004 |
|                       | Mean time consumed by nurse for preparation of the call in minutes | N (SD)                               | 3.5(2.5)        |
|                       | Heart disease group                                                |                                      | 4.2(3.2)        |
|                       | Diabetes group                                                     |                                      | <i>P</i> <0.001 |

**Supplemental Table 5: Results per outcome from included studies-- Secondary Outcome: Medication Reconciliation and Recommendations to Change Drug Therapy**

| Study                                                                                                                                     | Outcome measure                                                                                  | Effect measures                                                                                      | Result                                                                                                                                                                                    |
|-------------------------------------------------------------------------------------------------------------------------------------------|--------------------------------------------------------------------------------------------------|------------------------------------------------------------------------------------------------------|-------------------------------------------------------------------------------------------------------------------------------------------------------------------------------------------|
| Cho, 2006 [19]                                                                                                                            | Recommendations provided for drug modification (reports through IBGMS)                           | n (%)                                                                                                | 192 (12.1) (descriptive data only)                                                                                                                                                        |
| Chrischilles, 2014 [20]                                                                                                                   | Number of medication management problems (patient self-report of medication management problems) | Mean (SD)                                                                                            | Intervention: 1.4 (1.4)<br>Control: 1.6 (1.5)<br><i>P</i> = .1514                                                                                                                         |
|                                                                                                                                           | Keep list of current medications (patient self-report of medication management behaviour)        | <u>ITT:</u><br>n (%)<br><br><u>As-treated Analysis (ATA):</u><br>n (%)<br>OR (95% CI)                | <u>ITT:</u><br>Intervention: 559 (70.6)<br>Control: 196 (72.1)<br><i>P</i> = .6432<br><br><u>ATA:</u><br>High freq users: 113 (88.3)<br>Low freq users: 446 (67.2)<br>3.68 (1.83 to 7.37) |
|                                                                                                                                           | Reason for medications on list (patient self-report of medication management behaviour)          | <u>ITT:</u><br>n (%)<br><br><u>ATA:</u><br>n (%)<br>OR (95% CI)                                      | <u>ITT:</u><br>Intervention: 210 (38.7)<br>Control: 59 (30)<br><i>P</i> = .064<br><br><u>ATA:</u><br>High freq users: 57 (50)<br>Low freq users: 513 (34.6)<br>2.14 (1.13 to 3.64)        |
|                                                                                                                                           | Put OTC drugs on list (patient self-report of medication management behaviour)                   | n (%)                                                                                                | Intervention: 435 (78.1)<br>Control: 155 (79.1)<br><i>P</i> = .77                                                                                                                         |
|                                                                                                                                           | Updated list in past three months (patient self-report of medication management behaviour)       | n (%)                                                                                                | Intervention: 293 (52.9)<br>Control: 105 (54.4)<br><i>P</i> = .72                                                                                                                         |
|                                                                                                                                           | Discrepancies between doctor and patient medication lists                                        | <u>ATA:</u><br>n (%)<br>OR (95% CI)                                                                  | High freq users: 24 (19)<br>Low freq users: 53 (8)<br>2.21 (1.27 to 3.85)                                                                                                                 |
|                                                                                                                                           | Schnipper, 2012 [26]                                                                             | Discordant medications (Patient self-report survey assessed by RA or blinded physician adjudicators) | % mean (SD)<br><br>Adjusted OR (95% CI),                                                                                                                                                  |
| Number of discrepancies per patient with potential for harm (Patient self-report survey assessed by RA or blinded physician adjudicators) |                                                                                                  | Mean (SD)<br><br>Adjusted RR (95% CI),                                                               | Intervention: 0.24 (0.62)<br>Control: 0.34 (0.85)<br><i>P</i> = .23<br><br>0.65 (0.42 to 1.02)<br><i>P</i> = .059                                                                         |
| Number of discrepancies per patient with potential for severe harm (Patient self-                                                         |                                                                                                  | Mean (SD)                                                                                            | Intervention: 0.03 (0.22)<br>Control: 0.08 (0.35)<br><i>P</i> = 0.03                                                                                                                      |

|  |                                                                             |                                                                     |                                                                            |
|--|-----------------------------------------------------------------------------|---------------------------------------------------------------------|----------------------------------------------------------------------------|
|  | report survey assessed by RA or blinded physician adjudicators)             | Adjusted RR (95% CI),                                               | 0.31 (0.10 to 0.92)<br><i>P</i> = .04                                      |
|  | Report all prescribed medications (Patient self-report at follow-up survey) | Number who responded "always"/Number who answered that question (%) | Intervention: 515/689 (74.8)<br>Control: 399/572 (69.8)<br><i>P</i> = .048 |

**Supplemental Table 6: Results per outcome from included studies-- Secondary Outcome: Adverse Effects & Adverse Drug Events**

| Study                   | Outcome measure                                                                                                                      | Effect measures                                             | Result                                                                                         |
|-------------------------|--------------------------------------------------------------------------------------------------------------------------------------|-------------------------------------------------------------|------------------------------------------------------------------------------------------------|
| Chrischilles, 2014 [20] | Medication adverse effects in past three months (patient self-report)                                                                | n (%)                                                       | Intervention: 100 (12.9)<br>Control: 33 (12)<br><i>P</i> = .7883                               |
| Schnipper, 2012 [26]    | Number of preventable or ameliorable ADEs per patient (Patient self-report survey, assessed by RA or blinded physician adjudicators) | Mean (SD)<br><br>Adjusted RR ( 95% CI)                      | Intervention: 0.16 (0.44)<br>Control: 0.14 (0.47)<br><br>1.21 (0.74 to 1.98)<br><i>P</i> = .45 |
|                         | Duration of ameliorable ADEs in days (Patient self-report survey, assessed by RA or blinded physician adjudicators)                  | Median (IQR)<br><br>Adjusted OR (95% CI)                    | Intervention: 5 (1-7)<br>Control: 6 (1-8)<br><br>0.64 (0.25 to1.66)<br><i>P</i> = .35          |
| Weingart, 2013 [28]     | Number of ADEs (patient self-report telephone survey and review of electronic medical record)                                        | Number of events (rate/100 patients)                        | Intervention: 98 (26.1)<br>Control: 93 (25.6)<br><i>P</i> = .89                                |
|                         | Preventable ADEs (patient self-report telephone survey and review of electronic medical record)                                      | Number of events (rate/100 patients)                        | Intervention: 6 (1.6)<br>Control: 2 (0.6)<br><i>P</i> = .22                                    |
|                         | Ameliorable ADEs (patient self-report telephone survey and review of electronic medical record)                                      | Number of events (rate/100 patients)                        | Intervention: 24 (6.4)<br>Control: 19 (5.2)<br><i>P</i> = .43                                  |
| Mooney, 2017 [29]       | Treatment impact                                                                                                                     | Average difference in severity points reduced for SCH vs UC | 3.59 ( <i>P</i> < 0.001)                                                                       |
|                         | Adverse effects reduction                                                                                                            | Number of symptoms reduced for SCH vs UC                    | 10 of 11 symptoms ( <i>P</i> : 0.025 to <0.001)                                                |

**Supplemental Table 7: Results per outcome from included studies-- Secondary Outcome: Changes in Signs and Symptoms of Health Conditions**

|                                                            |                                                                             |                                                               |                                                                           |
|------------------------------------------------------------|-----------------------------------------------------------------------------|---------------------------------------------------------------|---------------------------------------------------------------------------|
| Cho, 2006 [19]                                             | FBG (mmol/L) (bloodwork at follow-up)                                       | Mean (SD)                                                     | Intervention: 8.51 (2.68)<br>Control: 7.87 (1.83)<br>$t = 1.25, P = .22$  |
|                                                            | A1C (%) (bloodwork at follow-up)                                            | Mean (SD)                                                     | Intervention: 6.7% (0.9%)<br>Control: 7.4 % (1.3%)<br>$t = 2.8, P = .006$ |
|                                                            | Total cholesterol (mmol/L) (bloodwork at follow-up)                         | Mean (SD)                                                     | Intervention: 4.5 (0.67)<br>Control: 4.49 (0.76)<br>$t = 0.062, P = .95$  |
|                                                            | Triglyceride (mmol/L) (bloodwork at follow-up)                              | Mean (SD)                                                     | Intervention: 1.16 (0.73)<br>Control: 1.28 (0.75)<br>$t = 0.73, P = .47$  |
|                                                            | HDL cholesterol (mmol/L) (bloodwork at follow-up)                           | Mean (SD)                                                     | Intervention: 1.37 (0.36)<br>Control: 1.26 (0.34)<br>$t = 1.41, P = .16$  |
| Fiks, 2015 [21]                                            | Days of school missed in the past month (patient/parent report of outcomes) | Mean (SD not reported)                                        | Intervention: 0.6<br>Control: 1.9<br>$P = .2$                             |
|                                                            |                                                                             | n (%) children missing $\geq 1$ day of school                 | Intervention: 14 (52)<br>Control: 16 (57)<br>$P = .7$                     |
|                                                            | Days of work missed in the past month (patient/parent report of outcomes)   | Mean (SD not reported)                                        | Intervention: <0.1<br>Control: 1.5<br>$P = .001$                          |
|                                                            |                                                                             | n (%) parents missing $\geq 1$ day of work                    | Intervention: 1 (4)<br>Control: 10 (37)<br>$P = .07$                      |
|                                                            | Nighttime symptoms (patient/parent report of outcomes)                      | Mean (SD)                                                     | Intervention: 85.0 (19.6)<br>Control 80.0 (21.3)<br>$P = .9$              |
|                                                            | Daytime symptoms (patient/parent report of outcomes)                        | Mean (SD)                                                     | Intervention: 82.3 (17.5)<br>Control 68.7 (21.4)<br>$P = .3$              |
|                                                            | Frequency of asthma flares (patient/parent report of outcomes)              | Mean (SD)                                                     | Intervention: 1.4 (2.0)<br>Control: 3.8 (3.8)<br>$P = .02$                |
|                                                            | Asthma symptoms while at best (patient/parent report of outcomes)           | Mean (SD)                                                     | Intervention: 2.1 (2.1)<br>Control: 4.4 (5.3)<br>$P = .1$                 |
|                                                            | Number of poor/uncontrolled asthma episodes                                 | Number of events (intervention only reported)                 | 17 events in 13 children                                                  |
| Functional limitations (patient/parent report of outcomes) | Mean (SD)                                                                   | Intervention: 86.5 (20.0)<br>Control: 80.2 (24.1)<br>$P = .4$ |                                                                           |
| Grant, 2008 [22]                                           | HbA1C (patient self-report to PHR)                                          | Mean % HcA1C                                                  | Intervention: 7.1<br>Control: 7.2<br>$P = .45$                            |
|                                                            | Patients at HbA1C goal (patient self-report to PHR)                         | n (%)                                                         | Intervention: 92 (73)<br>Control: 80 (68)<br>$P = .53$                    |

|                      |                                                                    |                                                                               |                                                                                                                                                                                                                                               |
|----------------------|--------------------------------------------------------------------|-------------------------------------------------------------------------------|-----------------------------------------------------------------------------------------------------------------------------------------------------------------------------------------------------------------------------------------------|
| Gustafson, 2012 [23] | Symptom free days (Asthma Control Questionnaire)                   | OR (95% CI)                                                                   | 0.18 (-0.88 to 1.60)<br><i>P</i> = 1.00                                                                                                                                                                                                       |
|                      | Asthma control (Asthma Control Questionnaire)                      | Mean change in intervention group minus mean change in control group (95% CI) | -0.31 (-0.56 to -0.06)<br><i>P</i> = .01                                                                                                                                                                                                      |
| Joseph, 2007 [24]    | Symptom-nights (patient self-report follow-up survey)              | Mean per two weeks (SD)<br>Adjusted RR (95% CI)                               | Intervention: 0.9 (2.3)<br>Control: 1.5 (2.5)<br>0.4 (0.2 to 0.8)<br><i>P</i> = .009                                                                                                                                                          |
|                      | Symptom-days (patient self-report follow-up survey)                | Mean per two weeks (SD)<br>Adjusted RR (95% CI)                               | Intervention: 2.1 (3.0)<br>Control: 2.8 (3.4)<br>0.5 (0.4 to 0.8)<br><i>P</i> = .003                                                                                                                                                          |
|                      | Days of restricted activity (patient self-report follow-up survey) | Mean per two weeks (SD)<br>Adjusted RR (95% CI)                               | Intervention: 1.3 (2.2)<br>Control: 2.3 (3.4)<br>0.5 (0.3 to 0.8)<br><i>P</i> = .02                                                                                                                                                           |
|                      | Days of changed plans (patient self-report follow-up survey)       | Mean (SD)<br>Adjusted RR (95% CI)                                             | Intervention: 0.4 (1.2)<br>Control: .6 (1.5)<br>0.5 (0.3 to 1.2)<br><i>P</i> = .17                                                                                                                                                            |
|                      | Schooldays missed (patient self-report follow-up survey)           | Mean per 30 days (SD)<br>Adjusted RR (95% CI)                                 | Intervention: 0.4 (1.2)<br>Control: 1.2 (3.3)<br>0.3 (0.1 to 0.7)<br><i>P</i> = .006                                                                                                                                                          |
| Joseph, 2013 [25]    | Symptom-days (patient self-report follow-up survey)                | Mean (SD)<br>Adjusted RR (95% CI)                                             | <u>All patients:</u><br>Intervention: 3.9 (5.9)<br>Control: 5.2 (6.4)<br>0.8 (0.6 to 1.0)<br><i>P</i> = .019<br><br><u>Moderate to severe asthma:</u><br>Intervention: 6.2 (7.7)<br>Control: 9.2 (8.1)<br>0.6 (0.5 to 0.9)<br><i>P</i> = .013 |
|                      | Symptom-nights (patient self-report follow-up survey)              | Mean (SD)<br>Adjusted RR (95% CI)                                             | <u>All patients:</u><br>Intervention: 2.7 (5.6)<br>Control: 2.8 (4.9)<br>(0.7 to 1.6)<br><i>P</i> = .82<br><br><u>Moderate to severe asthma:</u><br>Intervention: 5.1 (6.6)<br>Control: 6.4 (7.9)<br>0.7 (0.4 to 1.2)<br><i>P</i> = .210      |
|                      | Schooldays missed (patient self-report follow-up survey)           | Mean (SD)<br>Adjusted RR (95% CI)                                             | <u>All patients:</u><br>Intervention: 2.6 (4.3)<br>Control: 3.1 (4.9)<br>0.8 (0.6 to 1.0)<br><i>P</i> = .08<br><br><u>Moderate to severe asthma:</u><br>Intervention: 3.5 (5.6)                                                               |

|                  |                                                                                                   |                                       |                                                                                                                                                                                                                                              |
|------------------|---------------------------------------------------------------------------------------------------|---------------------------------------|----------------------------------------------------------------------------------------------------------------------------------------------------------------------------------------------------------------------------------------------|
|                  |                                                                                                   |                                       | Control: 5.1 (7.0)<br>0.5 (0.3 to 0.8)<br><i>P</i> = .009                                                                                                                                                                                    |
|                  | Schooldays missed because of asthma (patient self-report follow-up survey)                        | Mean (SD)<br><br>Adjusted RR (95% CI) | <u>All patients:</u><br>Intervention: 0.8 (2.1)<br>Control: 1.4 (3.9)<br>0.8 (0.5 to 1.2)<br><i>P</i> = .25<br><br><u>Moderate to severe asthma:</u><br>Intervention: 1.3 (2.6)<br>Control: 3.3 (6.6)<br>0.4 (0.2 to 0.8)<br><i>P</i> = .007 |
|                  | Days of restricted activity (patient self-report follow-up survey)                                | Mean (SD)<br><br>Adjusted RR (95% CI) | <u>All patients:</u><br>Intervention: 3.2 (5.5)<br>Control: 4.2 (6.0)<br>0.8 (0.6 to 1.1)<br><i>P</i> = .14<br><br><u>Moderate to severe asthma:</u><br>Intervention: 5.3 (7.4)<br>Control: 7.1 (7.6)<br>0.6 (0.4 to 0.9)<br><i>P</i> = .025 |
|                  | Uncontrolled asthma two or more days per week over 30 days (patient self-report follow-up survey) | n (%)<br><br>Adjusted OR (95% CI)     | Intervention: 23 (11)<br>Control: 46 (21)<br>0.5 (0.2 to 0.8)<br><i>P</i> = .006                                                                                                                                                             |
|                  | Three or more symptom-nights (patient self-report follow-up survey)                               | n (%)<br><br>Adjusted OR (95% CI)     | Intervention: 50 (25)<br>Control: 68 (31)<br>0.6 (0.4 to 1.0)<br><i>P</i> = .074                                                                                                                                                             |
|                  | More than two schooldays missed (patient self-report follow-up survey)                            | n (%)<br><br>Adjusted OR (95% CI)     | Intervention: 68 (33)<br>Control: 89 (41)<br>0.7 (0.4 to 1.1)<br><i>P</i> = .09                                                                                                                                                              |
|                  | More than two schooldays missed due to asthma (patient self-report follow-up survey)              | n (%)<br><br>Adjusted OR (95% CI)     | Intervention: 26 (13)<br>Control: 32 (15)<br>0.8 (0.5 to 1.5)<br><i>P</i> = .52                                                                                                                                                              |
|                  | More than four days of restricted activity (patient self-report follow-up survey)                 | n (%)<br><br>Adjusted OR (95% CI)     | Intervention: 39 (19)<br>Control: 68 (31)<br>Adjusted OR (95% CI): 5 (0.3 to 0.9)<br><i>P</i> = .01                                                                                                                                          |
|                  | More than four days of changed plans (patient self-report follow-up survey)                       | n (%)<br><br>Adjusted OR (95% CI)     | Intervention: 20 (10)<br>Control: 24 (11)<br>0.8 (0.4 to 1.7)<br><i>P</i> = .58                                                                                                                                                              |
| Simon, 2011 [27] | Depression score (Symptom Checklist)                                                              | Mean (SD)                             | Intervention: 0.95 (0.71)<br>Control: 1.17 (0.81)<br><i>t</i> = 2.05, <i>P</i> = .043,                                                                                                                                                       |
| Ahmed, 2016 [30] | Asthma Control status at 6 months                                                                 | n (%)                                 | Intervention (observed):<br>45(17)                                                                                                                                                                                                           |

|                       |                                                               |                 |                                                                                                                                                |
|-----------------------|---------------------------------------------------------------|-----------------|------------------------------------------------------------------------------------------------------------------------------------------------|
|                       |                                                               | OR (95% CI)     | Control (observed): 45(16)<br>0.62 (0.16 to 2.33)<br><br>Intervention (imputed):<br>46(18)<br>Control (imputed): 51(19)<br>0.94 (0.33 to 2.71) |
| Karhula, 2015<br>[31] | HbA1C goal (measured at follow-up)                            | Change (95% CI) | Intervention: 0.04 (-0.09, 0.17)<br>Control: 0.18 (-0.02, 0.35)                                                                                |
|                       | Waist circumference, between-group difference                 | Change (95% CI) | -1.711 (-3.042 to -0.38)<br><i>P</i> = 0.01                                                                                                    |
| Carlsen, 2017<br>[32] | Trough IFX concentration – controlled for treatment intervals | Change (95% CI) | -2.19 (-5.37 to 0.99)<br><i>P</i> = 0.18                                                                                                       |



**Supplemental Table 8: Results per outcome from included studies-- Secondary Outcome: Health Services Utilization**

| Study             | Outcome measure                                                   | Effect measures                                 | Result                                                                                                                                                                                                                                      |
|-------------------|-------------------------------------------------------------------|-------------------------------------------------|---------------------------------------------------------------------------------------------------------------------------------------------------------------------------------------------------------------------------------------------|
| Fiks, 2015 [21]   | Hospitalizations (patient/parent self-report)                     | Number of events<br>OR (95% CI)                 | Intervention: 0<br>Control: 2<br>0.33 (0.013 to 8.56)<br><i>P</i> = .51                                                                                                                                                                     |
|                   | ED visits (patient/parent self-report)                            | Number of events<br>OR                          | Intervention: 3<br>Control: 9<br>0.29 (0.053 to 1.60)<br><i>P</i> = .16                                                                                                                                                                     |
|                   | Asthma specialist visits (patient/parent self-report)             | Number of events<br>OR                          | Intervention: 11<br>Control: 21<br>0.56 (0.18 to 1.71)<br><i>P</i> = .31                                                                                                                                                                    |
|                   | Asthma primary care visits (patient/parent self-report)           | Number of events<br>OR                          | Intervention: 29<br>Control: 41<br>0.80 (0.26 to 2.46)<br><i>P</i> = .70                                                                                                                                                                    |
| Joseph, 2007 [24] | Asthma-related ED visits (patient self-report)                    | Mean per 12 months (SD)<br>Adjusted RR (95% CI) | Intervention: 0.5 (2.0)<br>Control: 0.8 (1.9)<br>0.5 (0.3-1.3)<br><i>P</i> = .08                                                                                                                                                            |
|                   | Asthma-related hospitalizations (patient self-report)             | Mean per 12 months (SD)<br>Adjusted RR (95% CI) | Intervention: 0.2 (0.6)<br>Control: 0.6 (2.0)<br>RR: 0.2 (0.2-0.9)<br><i>P</i> = .01                                                                                                                                                        |
| Joseph, 2013 [25] | Asthma-related ED visits (patient self-report)                    | Mean (SD)<br>Adjusted RR (95% CI)               | <u>All patients:</u><br>Intervention: 0.9 (2.1)<br>Control: 0.9 (2.4)<br>1.0 (0.7 to 1.4)<br><i>P</i> = .92<br><br><u>Moderate to severe asthma:</u><br>Intervention: 1.5 (3.4)<br>Control: 1.7 (3.7)<br>1.0 (0.5 to 2.0)<br><i>P</i> = .95 |
|                   | Asthma-related hospitalizations (patient self-report)             | Mean (SD)<br>Adjusted RR (95% CI)               | <u>All patients:</u><br>Intervention: 0.3 (1.2)<br>Control: 0.3 (1.0)<br>1.2 (0.5 to 2.6)<br><i>P</i> = .66<br><br><u>Moderate to severe asthma:</u><br>Intervention: 0.3 (0.8)<br>Control: 0.5 (1.1)<br>0.6 (0.2 to 2.2)<br><i>P</i> = .47 |
| Simon, 2011 [27]  | Participants making any specialty mental health visits (EMR data) | n (%)<br>Chi square, df                         | Intervention: 34 (32)<br>Control: 32 (31)<br>0.01, 1.<br><i>P</i> = .91                                                                                                                                                                     |
|                   | Mental health visits for                                          | Mean (SD)                                       | Intervention: 0.4 (1.4)                                                                                                                                                                                                                     |

|                     |                                                              |                                      |                                                                     |
|---------------------|--------------------------------------------------------------|--------------------------------------|---------------------------------------------------------------------|
|                     | medication management (EMR data)                             |                                      | Control: 0.3 (1.5)<br><i>P</i> = .18                                |
| Weingart, 2013 [28] | Primary care appointments (patient self-report and EMR data) | Number of events (rate/100 patients) | Intervention: 579 (154.4)<br>Control: 556 (153.2)<br><i>P</i> = .90 |
|                     | Specialist appointments (patient self-report and EMR data)   | Number of events (rate/100 patients) | Intervention: 824 (219.7)<br>Control: 675 (186.0)<br><i>P</i> = .19 |
|                     | ED visits (patient self-report and EMR data)                 | Number of events (rate/100 patients) | Intervention: 31 (8.3)<br>Control: 34 (9.4)<br><i>P</i> = .72       |
|                     | Hospital admissions (patient self-report and EMR data)       | Number of events (rate/100 patients) | Intervention: 22 (5.9)<br>Control: 25 (6.9)<br><i>P</i> = .62       |
|                     | Inpatient days (patient self-report and EMR data)            | Number of events (rate/100 patients) | Intervention: 54 (14.4)<br>Control: 86 (23.7)<br><i>P</i> = .23     |

**Supplemental Table 9: Results per outcome from included studies—Secondary Outcome: Patient overall health status**

| <b>Study</b>          | <b>Outcome measure</b>                            | <b>Effect measures</b>                    | <b>Result</b>                                                                                                                                                                            |
|-----------------------|---------------------------------------------------|-------------------------------------------|------------------------------------------------------------------------------------------------------------------------------------------------------------------------------------------|
| Joseph, 2007<br>[24]  | QoL cumulative score                              | Mean (SD)<br><br>Adjusted RR (95% CI)     | Intervention: 5.3 (1.3)<br><br>Control: 5.0 (1.5)<br><br>1.2 (0.9 to 1.6)<br><br><i>P</i> = .35                                                                                          |
| Ahmed, 2016<br>[30]   | Mini-Asthma Quality of Life Questionnaire (MAQLQ) | Mean (SD)<br><br>Mean Change (95% CI)     | Intervention (observed): 5.6(1.2)<br>Control (observed): 5.2(1.2)<br>0.31 (-0.21 to 0.84)<br><br>Intervention (imputed): 5.3(1.3)<br>Control (imputed): 5.1(1.2)<br>0.22 (-0.34 to 0.78) |
| Karhula, 2015<br>[31] | QoL General Health score                          | Heart disease patients<br>Change (95% CI) | Intervention: 2.60 (0.36, 4.84)<br>Control: 0.56 (-2.93, 4.05)<br>Difference = 1.77 (-2.06, 5.61)<br><i>P</i> =0.36                                                                      |
|                       | QoL General Health score                          | Diabetes patients<br>Change (95% CI)      | Intervention: 3.47 (1.04, 5.89)<br>Control: 1.34 (-1.48, 4.17)<br>Difference: 2.34 (-1.72, 6.41)<br><i>P</i> =0.26                                                                       |
| Carlsen, 2017<br>[32] | Health-Related Quality of Life                    | Mean (SD)                                 | First score: 150.0 (15.6)<br>Last score: 148.8 (18.0)<br>Difference: 2.2 (16.6)<br><i>P</i> = 0.63                                                                                       |

**Supplemental Table 10: Results per outcome from included studies—Secondary Outcome: Patient satisfaction with health care**

| <b>Study</b>     | <b>Outcome measure</b>                                      | <b>Effect measures</b>        | <b>Result</b>                                                                                                    |
|------------------|-------------------------------------------------------------|-------------------------------|------------------------------------------------------------------------------------------------------------------|
| Fiks, 2015 [21]  | Satisfaction with asthma care (patient questionnaire)       | N/A                           | “There were no significant differences between study arms in satisfaction with asthma care (data not shown)”[15] |
| Simon, 2011 [27] | Quality of antidepressant treatment (patient questionnaire) | n (%) patients very satisfied | Intervention: 56 (53)<br>Control: 31 (33)<br><i>P</i> = .004                                                     |

**Supplemental Table 11: Results of Subgroup Analyses: Age**

| <b>Subgroup</b>        | <b>Studies included in subgroup</b> | <b>Results</b>                                                                                                                                                                                                                                                                                                                                                                                                                                                                                                                                                                                                                                                                                                                                                                                                                                                                                                                                                                                                                                                                           |
|------------------------|-------------------------------------|------------------------------------------------------------------------------------------------------------------------------------------------------------------------------------------------------------------------------------------------------------------------------------------------------------------------------------------------------------------------------------------------------------------------------------------------------------------------------------------------------------------------------------------------------------------------------------------------------------------------------------------------------------------------------------------------------------------------------------------------------------------------------------------------------------------------------------------------------------------------------------------------------------------------------------------------------------------------------------------------------------------------------------------------------------------------------------------|
| Children and teenagers | 21, 23-25, 32                       | Evidence for the effect of ehealth tools on asthma-related hospitalizations was mixed, with two studies reporting no effect of intervention [21, 25], and one study reporting a significant decrease in the intervention group [24]. Evidence for the outcome of improvement of symptoms of health conditions was generally positive. Fiks et al. [21] found significantly less frequent asthma flare-ups in the intervention group, and Gustafson et al. [23] found a significant improvement in asthma control in the intervention. Joseph et al. [24, 25] found less asthma symptom-nights in the intervention group. Joseph et al. [24] found a significant increase of children with rescue inhalers in the intervention group. Carlsen et al. [32] found a significant decrease in number of infliximab infusions required in patients using the ehealth tool. Overall, there is a positive trend showing that ehealth interventions may improve asthma symptoms and control, and there is a small amount of evidence that they may help decrease asthma-related hospitalizations. |
| Elderly (65+)          | 20                                  | No significant differences were seen between active and control groups for any outcomes with the exception of inappropriate use $\geq 2$ NSAID medications, which was significantly lower in the intervention group.                                                                                                                                                                                                                                                                                                                                                                                                                                                                                                                                                                                                                                                                                                                                                                                                                                                                     |
| Adults                 | 19, 22, 27, 29-31                   | Comparative evidence from RCTs is mixed for the primary outcome of changes made to medication regimens, with one study finding no differences between groups [19], and two studies finding higher numbers of medication changes in the intervention groups [22, 27]. Simon et al. [27] reported an improvement in patient satisfaction with depression care favouring use of ehealth tools. Mooney et al. [29] found a significant decrease in 10 of 11 measured adverse effects as a result of chemotherapy in the intervention group relative to usual care. Ahmed et al. [30] found a significant improvement in depression symptoms in asthmatic patients. Karhula et al. [31] found no significant changes in signs or symptoms of chronic disease or in overall health status.                                                                                                                                                                                                                                                                                                     |

**Supplemental Table 12: Results of Subgroup Analyses: Conditions**

| <b>Subgroup</b> | <b>Studies included in subgroup</b> | <b>Results</b>                                                                                                                                                                                                                                                                                                                                                                                                                                                                                                                                                                                                                                                 |
|-----------------|-------------------------------------|----------------------------------------------------------------------------------------------------------------------------------------------------------------------------------------------------------------------------------------------------------------------------------------------------------------------------------------------------------------------------------------------------------------------------------------------------------------------------------------------------------------------------------------------------------------------------------------------------------------------------------------------------------------|
| Asthma          | 21, 23-25, 30                       | There is evidence that ehealth tools may have the potential to reduce symptoms of asthma, frequency of asthma flare-ups, and number of days of school or work missed due to asthma [21, 23-25]. They may also promote better asthma control, availability and use of rescue inhalers, and may have the potential to improve asthma symptoms in vulnerable groups (i.e. African-American adolescents living in urban centres [24, 25]. One study that focused on asthma found no statistically significant difference in asthma-related outcome, however it found a significant improvement in symptoms of depression at six months in asthmatic patients [30]. |
| Diabetes        | 19, 22, 31                          | Use of ehealth tools for patient reporting of symptoms and adverse effects may have the potential to influence medication changes in diabetics [31]. The use of ehealth tools to reduce HbA1C was mixed, making it difficult to draw conclusions [19, 22, 31].                                                                                                                                                                                                                                                                                                                                                                                                 |

**Supplemental Table 13: Results of Subgroup Analyses: Intervention Type**

| <b>Subgroup</b>                                     | <b>Studies included in subgroup</b> | <b>Results</b>                                                                                                                                                                                                                                                                                                                                                                                                         |
|-----------------------------------------------------|-------------------------------------|------------------------------------------------------------------------------------------------------------------------------------------------------------------------------------------------------------------------------------------------------------------------------------------------------------------------------------------------------------------------------------------------------------------------|
| ehealth tool only                                   | 20-22, 27-28, 32                    | Of the three studies in this group investigating changes in medications [20, 22, 27], all found at least one significant increase in medication changes favouring ehealth tools. Of the three studies in this group investigating improvements in signs and symptoms [21, 22, 27], only Grant et al. [22] did not find at least one significant improvement in outcomes.                                               |
| ehealth tool plus clinician support/case management | 19, 23-26, 29-31                    | Two of three studies in this group that measured self-management or self-efficacy [23, 26, 30] found positive significant effects for at least one outcome. One study measured medication reconciliation and recommendation, and it found two positive significant outcomes [31]. All six studies measuring improvements in signs and symptoms found at least one positive significant improvement [19, 23-26, 29-31]. |

**Supplemental Table 14: Results of Subgroup Analyses: Linkage to EMRs**

| <b>Subgroup</b> | <b>Studies included in subgroup</b> | <b>Results</b>                                                                                                                                                                                                                                                                                                                                                                                                                                                                                                                                    |
|-----------------|-------------------------------------|---------------------------------------------------------------------------------------------------------------------------------------------------------------------------------------------------------------------------------------------------------------------------------------------------------------------------------------------------------------------------------------------------------------------------------------------------------------------------------------------------------------------------------------------------|
| Linked          | 21, 22, 26-31                       | Of the two studies that measured medication reconciliation and recommendation, one found two positive significant outcomes [26]. Both studies with this functionality measured $\geq 1$ positive significant increase in medication changes [22, 27]. Five studies measured changes in signs and symptoms; four found $\geq 1$ positive significant outcomes [21, 27, 30, 31], and one found no significant outcomes [28]. Two studies that measured patient overall health status both found no significant difference in this outcome [30, 31]. |
| Unlinked        | 19, 20, 23-25, 32                   | Four studies measured changes in medication; three found $\geq 1$ positive significant outcomes [20, 24, 32], and one found no significant outcomes [19]. Five studies measured changes in signs and symptoms of which four found $> 1$ positive significant outcomes [20, 23-25], and one found no significant difference in outcomes [32].                                                                                                                                                                                                      |



**Supplemental Table 15: Results of Subgroup Analyses: Direct Clinician Access to Patient Self-Reports**

| Subgroup                      | Studies included in subgroup | Results                                                                                                                                                                                                                                                                                                                                                                                                                                                                     |
|-------------------------------|------------------------------|-----------------------------------------------------------------------------------------------------------------------------------------------------------------------------------------------------------------------------------------------------------------------------------------------------------------------------------------------------------------------------------------------------------------------------------------------------------------------------|
| Direct access to self-reports | 19, 21-23, 26, 28-32         | Four studies measured patient self-management and self-efficacy; two found $\geq 1$ positive significant outcomes [23, 26], and two found no significant outcomes [21, 30]. One study measured medication reconciliation and recommendation, and it found two positive significant outcomes [26]. Seven studies measured changes in signs and symptoms; five found $>1$ positive significant outcomes [19, 21, 23, 30, 31], and two found no significant outcomes [22, 32]. |
| No access to self-reports     | 20, 23, 25, 27               | Three studies measured changes in medication, and all three had $\geq 1$ positive significant outcome [20, 24, 27]. Three studies measured changes in signs and symptoms, and all found $>1$ positive significant outcomes [24, 25, 27]. One study measured patient satisfaction, and it found one positive, significant outcome [27].                                                                                                                                      |

**Supplemental Table 16: Results of Subgroup Analyses: Direct Patient-Provider Communication**

| <b>Subgroup</b>                     | <b>Studies included in subgroup</b> | <b>Results</b>                                                                                                                                                                                                                                                                                                                                                                                                                                                                                                                                                                                                                                                                                                                                                                                                                                                                                 |
|-------------------------------------|-------------------------------------|------------------------------------------------------------------------------------------------------------------------------------------------------------------------------------------------------------------------------------------------------------------------------------------------------------------------------------------------------------------------------------------------------------------------------------------------------------------------------------------------------------------------------------------------------------------------------------------------------------------------------------------------------------------------------------------------------------------------------------------------------------------------------------------------------------------------------------------------------------------------------------------------|
| With communication functionality    | 19, 22, 23, 27-29, 30-31            | Three studies measured changes in medication; two found $\geq 1$ positive significant outcomes [22, 27], and one found no significant outcomes [19]. Six studies measured changes in signs and symptoms; five found $>1$ positive significant outcomes [19, 23, 27, 30, 31], and one found no significant outcomes [22]. Of three studies with this functionality that reported on self-management and self-efficacy [23, 26], two found a positive significant improvement [23, 26] and one found no significant improvement [30]. One study measured medication reconciliation and recommendation, and it found two positive significant outcomes [26]. Two studies that reported no effect of intervention for self-management and self-efficacy did not utilize this functionality [20, 21]. One study measured patient satisfaction, and it found one positive, significant outcome [27]. |
| Without communication functionality | 20, 21, 24, 25, 29                  | Two of these studies measured changes in medication, and both found $\geq 1$ positive significant outcome [20, 24]. Three studies measured changes in signs and symptoms, and all found $>1$ positive significant outcomes [21, 24, 25].                                                                                                                                                                                                                                                                                                                                                                                                                                                                                                                                                                                                                                                       |
