# Supplementary material for: The Use and Effects of Electronic Health Tools for Patient Self-Monitoring and Reporting of Outcomes Following Medication Use: Systematic Review
Source: PubMed Central journal article supplement (PMC6315271; doi:10.2196/jmir.9284), 2018-12-18
Supplement: jmir_v20i12e294_app5.pdf [file jmir_v20i12e294_app5.pdf]

### Multimedia Appendix V. Breakdown of study results by outcome

| Outcome                                                  | Cho, 2006 [19] | Chrischilles, 2014 [20] | Fiks, 2015 [21] | Grant, 2008 [22] | Gustafson, 2012 [23] | Joseph, 2007 [24] | Joseph, 2013 [25] | Schnipper, 2012 [26] | Simon, 2011 [27] | Weingart, 2013 [28] | Mooney, 2017 [29] | Ahmed, 2016 [30] | Karhula, 2015 [31] | Carlsen, 2017 [32] |
|----------------------------------------------------------|----------------|-------------------------|-----------------|------------------|----------------------|-------------------|-------------------|----------------------|------------------|---------------------|-------------------|------------------|--------------------|--------------------|
| Changes in use of medications                            | N              | P                       | D               | P                |                      | P                 |                   |                      | P                |                     |                   |                  |                    | P                  |
| Changes in signs and symptoms of chronic disease         | P              |                         | P               | N                | P                    | P                 | P                 |                      | P                |                     |                   | P                | P                  | N                  |
| Patient self-management and self-efficacy                |                | N                       | N               |                  | P                    |                   |                   | P                    |                  |                     |                   | P                |                    |                    |
| Medication use behaviour                                 |                | N                       |                 |                  | N                    | N                 |                   |                      |                  |                     |                   |                  |                    |                    |
| Medication reconciliation and recommendations for change | D              | N                       |                 |                  |                      |                   |                   | P                    |                  |                     |                   |                  |                    |                    |
| Identification of adverse effects & ADEs                 |                | N                       | D               |                  |                      |                   |                   | N                    |                  | N                   | P                 |                  |                    | D                  |
| Health service utilization                               |                |                         | N               |                  |                      | P                 | N                 |                      | N                | N                   |                   | N                |                    |                    |
| Patient overall health status                            |                |                         |                 |                  |                      | N                 |                   |                      |                  |                     |                   | N                | N                  | N                  |
| Patient satisfaction with health care                    |                |                         | N               |                  |                      |                   |                   |                      | P                |                     |                   |                  |                    | D                  |

**P** is used to demonstrate at least one significant effect on outcomes.

**N** is used to demonstrate no significant effects on outcomes.

**D** is used to demonstrate descriptive data only.
